# Supplementary material for: Magnetic composite microspheres with a controlled mesoporous shell for highly efficient DNA extraction and fragment screening
Source: Royal Society of Chemistry journal article supplement (doi:10.1039/d4tb00104d), 2024-01-01
Supplement: d4tb00104d1.pdf [file d4tb00104d1.pdf]

## Supporting Information

### **Magnetic Composite Microspheres with Controlled Mesoporous Shell for Highly Efficient DNA Extraction and Fragment Screening**

Xiuli Wang, Qilin Guo, Jia Guo and Changchun Wang\*

State Key Laboratory of Molecular Engineering of Polymers, Department of  
Macromolecular Science, and Laboratory of Advanced Materials, Fudan University,  
Shanghai 200433, China.

Corresponding author: C. C. Wang; E-mail address: [ccwang@fudan.edu.cn](mailto:ccwang@fudan.edu.cn)

## TABLES

**Table S1** Synthetic recipes of magnetic MSP@mTiO<sub>2</sub> microspheres with different pore sizes.

| Sample                | EtOH<br>(mL) | H <sub>2</sub> O<br>(mL) | NH <sub>3</sub> ·H <sub>2</sub> O<br>(mL) | T<br>(°C) | t<br>(h) | Pore size<br>(nm) | Surface area<br>(m <sup>2</sup> ·g <sup>-1</sup> ) |
|-----------------------|--------------|--------------------------|-------------------------------------------|-----------|----------|-------------------|----------------------------------------------------|
| MSP@mTiO <sub>2</sub> | 40           | 20                       | 0                                         | 80        | 18       | 2.8               | 455                                                |
|                       | 40           | 20                       | 0                                         | 120       | 18       | 7.6               | 160                                                |
|                       | 40           | 20                       | 0                                         | 160       | 18       | 11.2              | 122                                                |
|                       | 40           | 20                       | 1                                         | 160       | 18       | 16.0              | 88                                                 |
|                       | 40           | 20                       | 2                                         | 160       | 18       | 23.6              | 47                                                 |
|                       | 40           | 20                       | 3                                         | 160       | 18       | 28.7              | 44                                                 |

**Table S2** Surface zeta potential of MSP@mTiO<sub>2</sub> magnetic spheres with different pore sizes.

| Pore size (nm)         | MSP@mTiO <sub>2</sub> |      |      |      |      |      |
|------------------------|-----------------------|------|------|------|------|------|
|                        | 2.8                   | 7.6  | 11.2 | 16.0 | 23.6 | 28.7 |
| Zeta potential<br>(mV) | +3.7                  | +4.1 | +4.2 | +4.7 | +3.5 | +3.0 |

## FIGURES

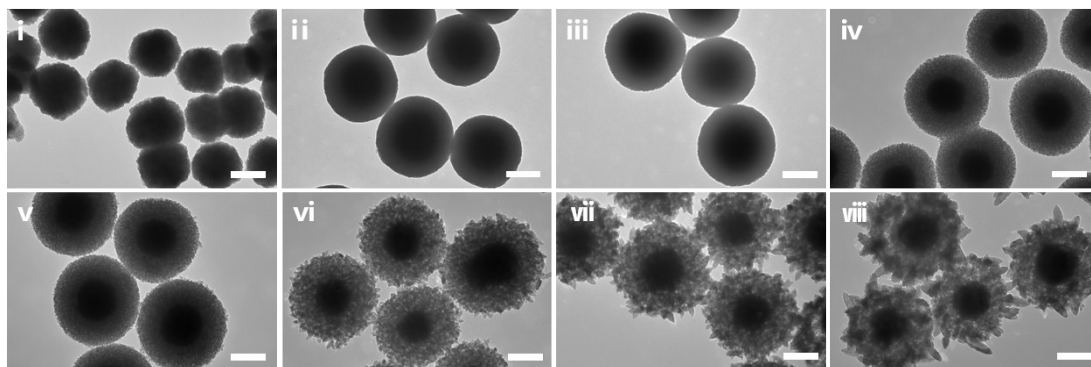

**Fig. S1** TEM images of (i) MSP, (ii) MSP@TiO<sub>2</sub> and (iii to viii) MSP@mTiO<sub>2</sub> microspheres with different pore size (the scale bars are 200 nm).

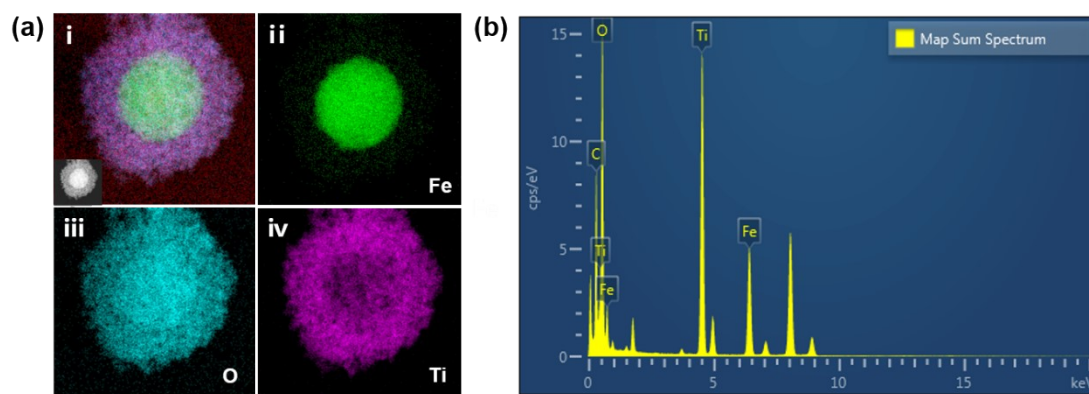

**Fig. S2** (a) TEM-EDS images of MSP@TiO<sub>2</sub> microspheres. (b) EDS and the content of each element for MSP@TiO<sub>2</sub> microspheres.

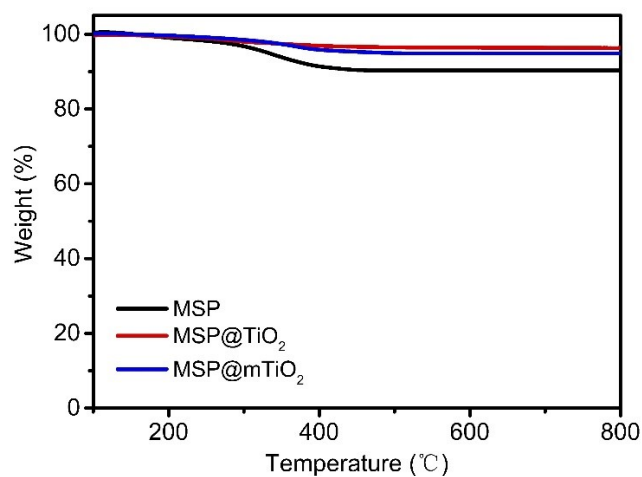

**Fig. S3** TGA curves of MSP, MSP@TiO<sub>2</sub> and MSP@mTiO<sub>2</sub> microspheres.

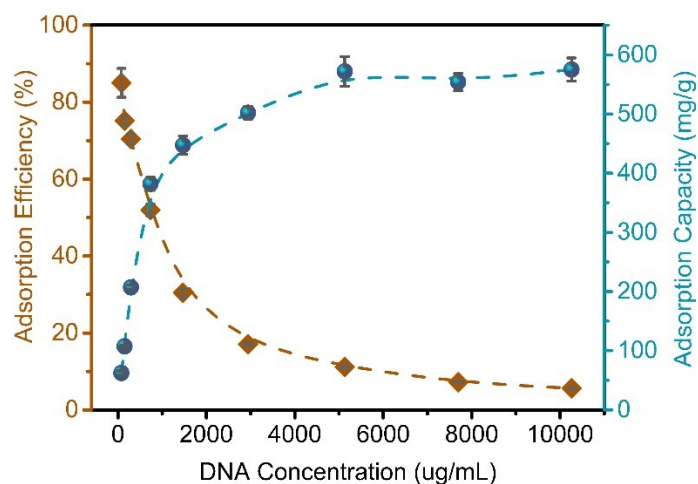

**Fig. S4** Adsorption efficiency and adsorption capacity at equilibrium state as a function of initial DNA concentration.

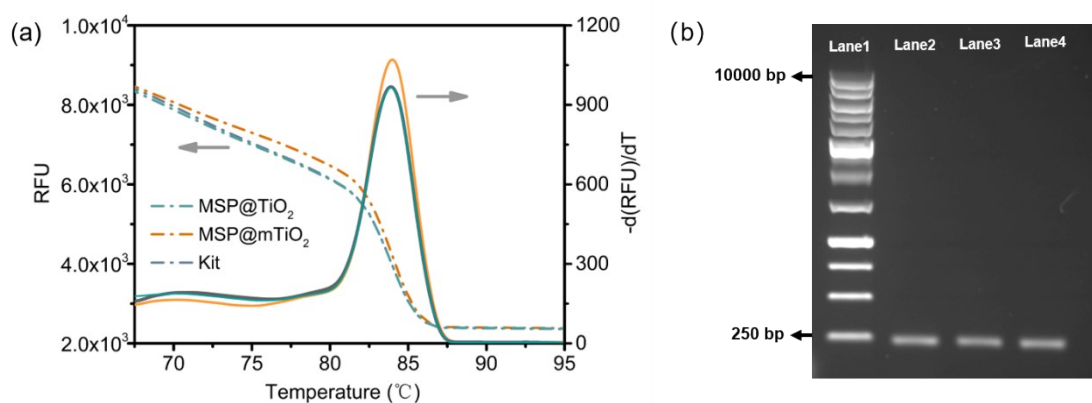

**Fig. S5** (a) Melting curves of a specific DNA sequences in arabidopsis plants extracted by MSP@TiO<sub>2</sub>, MSP@mTiO<sub>2</sub> and Kit after PCR. (b) Images of agarose gel electrophoresis of a specific DNA sequences in arabidopsis plants extracted by MSP@TiO<sub>2</sub> (Lane 2), MSP@mTiO<sub>2</sub> (Lane 3), Kit (Lane 4) after PCR.

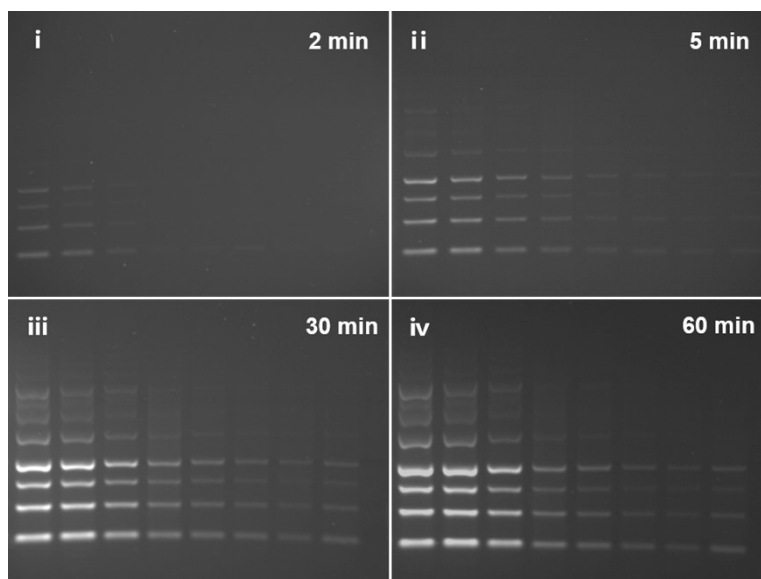

**Fig. S6** Gel electrophoresis images of DNA fragments (250~10000 bp) over time when eluted in different Na<sub>3</sub>PO<sub>4</sub> solutions (The concentrations of Na<sub>3</sub>PO<sub>4</sub> solutions in order from left to right are 50 mM, 5 mM, 2.5 mM, 1 mM, 0.1 mM, 0.05 mM, 0.025 mM and 0.01 mM ).
